# Supplementary material
Source: publisher figshare collection journal article supplement (https://f1000.figshare.com/ndownloader/files/100701)
Supplement: Supplementary file 1 [file 100701]

Non-leukoreduced (NLR)	Donor 1		Donor 2
Days of Storage	Nitrite (nM)		Nitrite (nM)
0
1	6.481719	4.760521	10.10682	9.189015
2	9.579896		7.918561	21.00076
3			6.28447	9.506818
4			8.074791	6.181726
5
6			11.6568	9.166793
7			13.93318	5.741331
8	7.629687
9
10			11.45077	5.007087
11
12	3.656875
13			4.904075	8.263477
14
15
16			10.78689	13.27158
17
18
19
20
21			4.492262	4.530091
22	4.246146
23
24			4.66421	3.857774
25
26
27
28	3.014688
29	1.148646		5.224761	4.953329
30
31
32	1.453542
33
34
35			7.83321	2.236551
36	2.222917	2.269063
37
38			1.954557
39	1.591875
40
41
42	0.9272917		3.662982
Leukoreduced (LR)	Donor 1		Donor 2
Days of Storage	Nitrite (nM)		Nitrite (nM)
0
1	5.6		10.0095	9.031155	12.41793
2	4.89		7.342705	5.180091	13.95365
3			9.852203	6.856383
4	6.75
5
6			6.935664	7.54154
7
8	4.11
9
10			8.955556	11.8669
11
12	2.5
13			6.516549	6.874704
14
15
16			9.486761	5.795035	11.23357
17
18	3.41
19
20
21			2.309456	6.886525	5.589598
22	6.87
23
24			5.960756	10.15319
25
26
27
28	3.19
29			9.68306	12.56408
30
31
32	2.87		23.73572	24.62245
33
34
35			8.709638	16.31321
36	5.09
37
38			5.003229	12.02012
39	3.29
40
41
42	2.43		5.641083	4.183557
Whole Blood (WB)	Donor 1		Donor 2
Days of Storage	Nitrite (nM)		Nitrite (nM)
0
1	10.21		36.73771	54.361
2	12.23		22.33948	27.01742
3			21.45662	54.66735	65.0847
4	16.03		42.78006	55.33197
5
6			34.88764	25.68784
7			24.34492	38.34982
8	10.24
9
10			20.42469	22.14661
11
12	12.53
13
14
15	13.62
16			15.78877	23.30749
17
18	10.56
19
20
21			50.11676	43.21212
22
23
24			19.29857	19.47638
25
26
27
28	14.67
29			8.008359	5.296732	14.1193
30
31
32	11.9		11.65805	12.22226
33
34
35			14.66641	14.04977
36
37
38			10.02128	16.04027
39	7.8
40
41
42	8.23		16.00608	15.41793
